# Supplementary material
Source: publisher site journal article supplement (https://www.dovepress.com/article/612153)
Supplement: Supplementary file 1 [file 612153%20Revised%20Supplementary%20File.docx]

**Table S1.** Missing data patterns for all study variables.

| **Variable** | **Complete data** | **Missing data** | **Missing ratio** |
| --- | --- | --- | --- |
| Age | 246 | 0 | 0% |
| Height | 246 | 0 | 0% |
| Weight | 246 | 0 | 0% |
| Body mass index | 246 | 0 | 0% |
| Sex | 246 | 0 | 0% |
| ASA physical status | 246 | 0 | 0% |
| Type of procedure | 246 | 0 | 0% |
| Asthma | 246 | 0 | 0% |
| COPD | 246 | 0 | 0% |
| Hypertension | 246 | 0 | 0% |
| Diabetes | 246 | 0 | 0% |
| Cardiovascular disorder | 246 | 0 | 0% |
| Discharge time | 237 | 9 | 4% |
| Overall recovery at 0.5 h after procedure | 237 | 9 | 4% |
| Overall recovery at 24 h after procedure | 235 | 11 | 5% |
| Overall recovery at 72 h after procedure | 232 | 14 | 6% |
| ADL recovery at 24 h after procedure | 235 | 11 | 5% |
| ADL recovery at 72 h after procedure | 232 | 14 | 6% |
| Nociceptive recovery at 0.5 h after procedure | 237 | 9 | 4% |
| Nociceptive recovery at 24 h after procedure | 235 | 11 | 5% |
| Nociceptive recovery at 72 h after procedure | 232 | 14 | 6% |
| Emotion recovery at 0.5 h after procedure | 237 | 9 | 4% |
| Emotion recovery at 24 h after procedure | 235 | 11 | 5% |
| Emotion recovery at 72 h after procedure | 232 | 14 | 6% |
| Cognitive recovery at 0.5 h after procedure | 237 | 9 | 4% |
| Cognitive recovery at 24 h after procedure | 235 | 11 | 5% |
| Cognitive recovery at 72 h after procedure | 232 | 14 | 6% |
| Physiological recovery at 15 min after procedure | 237 | 9 | 4% |
| Physiological recovery at 30 min after procedure | 237 | 9 | 4% |
| Injection pain | 237 | 9 | 4% |
| Duration of bronchoscopy | 237 | 9 | 4% |
| Induction time | 237 | 9 | 4% |
| Propofol consumption | 237 | 9 | 4% |
| Emergence time | 237 | 9 | 4% |
| Cough severity | 237 | 9 | 4% |
| Bronchoscopist satisfaction score | 237 | 9 | 4% |
| Patient satisfaction score | 237 | 9 | 4% |
| Patient willingness to repeat the bronchoscopy | 237 | 9 | 4% |
| Patient willingness to recommend the bronchoscopy | 237 | 9 | 4% |
| Hypoxemia | 237 | 9 | 4% |
| Bradycardia | 237 | 9 | 4% |
| Tachycardia | 237 | 9 | 4% |
| Hypotension | 237 | 9 | 4% |
| Hypertension | 237 | 9 | 4% |
| Postoperative nausea or vomiting | 234 | 12 | 5% |
| Nightmare | 232 | 14 | 6% |

ASA: American Society of Anesthesiologists physical status classification; COPD: Chronic obstructive pulmonary disease; ADL: Activities of daily living.

**Table S2.** Recovery Rates by PostopQRS Domain: Propofol + esketamine 0.1 Versus Propofol alone.

|  | *n* (%) | | Estimated difference  (95% CI) | Odd ratio (95% CI) | *P* value |
| --- | --- | --- | --- | --- | --- |
| Propofol + esketamine 0.1  (*n* = 76), *n* (%) | Propofol  alone (*n* = 79), *n* (%) |
| Cognitive |  |  |  |  |  |
| 30 min | 61 (80.3) | 65 (82.3) | –0.02 (–0.14 to 0.1) | 1.14 (0.47 to 2.79) | 0.838 |
| 24 h | 70 (92.1) | 76 (96.2) | –0.04 (–0.11 to 0.03) | 2.16 (0.44 to 13.86) | 0.322 |
| 72 h | 71 (93.4) | 76 (96.2) | –0.03 (–0.1 to 0.04) | 1.78 (0.33 to 11.86) | 0.489 |
| Overall |  |  |  |  |  |
| 30 min | 47 (61.8) | 52 (65.8) | –0.04 (–0.19 to 0.11) | 1.19 (0.59 to 2.41) | 0.620 |
| 24 h | 63 (82.9) | 71 (89.9) | –0.07 (–0.18 to 0.04) | 1.82 (0.65 to 5.43) | 0.245 |
| 72 h | 68 (89.5) | 74 (93.7) | –0.04 (–0.13 to 0.05) | 1.73 (0.47 to 7.08) | 0.396 |
| Nociceptive |  |  |  |  |  |
| 30 min | 67 (88.2) | 70 (88.6) | 0.00 (–0.11 to 0.1) | 1.04 (0.34 to 3.17) | >0.99 |
| 24 h | 69 (90.8) | 74 (93.7) | –0.03 (–0.11 to 0.06) | 1.50 (0.39 to 6.28) | 0.559 |
| 72 h | 75 (98.7) | 77 (97.5) | 0.01 (–0.03 to 0.06) | 0.51 (0.00 to10.10) | >0.99 |
| Emotion |  |  |  |  |  |
| 30 min | 69 (90.8) | 75 (94.9) | –0.04 (–0.12 to 0.04) | 1.89 (0.46 to 9.22) | 0.363 |
| 24 h | 74 (97.4) | 79 (100) | –0.03 (–0.06 to 0.01) | – | 0.239 |
| 72 h | 75 (98.7) | 79 (100) | –0.01 (–0.04 to 0.01) | – | 0.490 |
| Activities of daily living |  |  |  |  |  |
| 24 h | 76 (100.0) | 79 (100.0) | 0.00 (0.00 to 0.00) | – | >0.99 |
| 72 h | 76 (100.0) | 79 (100.0) | 0.00 (0.00 to 0.00) | – | >0.99 |
| Physiological |  |  |  |  |  |
| 15 min | 49 (63.6) | 47 (59.5) | –0.07 (–0.22 to 0.09) | 0.84 (0.42 to 1.68) | 0.625 |
| 30 min | 69 (89.6) | 69 (87.3) | –0.02 (–0.13 to 0.09) | 0.80 (0.26 to 2.41) | 0.803 |

**Notes:** Recovery was defined as a postoperative score meeting or exceeding the baseline value. A generalized linear mixed model with a binomial distribution and logit link function was fitted to analyze changes in recovery rates over time. Odds ratios could not be estimated (–) when one group achieved 100% recovery. *P* values are two-sided and unadjusted for multiple comparisons.

**Abbreviations:** CI, confidence interval; PostopQRS, Postoperative Quality of Recovery Scale.

**Table S3.** Recovery Rates by PostopQRS Domain: Propofol + esketamine 0.2 Versus Propofol alone.

|  | *n* (%) | | Estimated difference  (95% CI) | Odd ratio (95% CI) | *P* value |
| --- | --- | --- | --- | --- | --- |
| Propofol + esketamine 0.2  (*n* = 77), *n* (%) | Propofol alone  (*n* = 79), *n* (%) |
| Overall |  |  |  |  |  |
| 30 min | 45 (58.4) | 52 (65.8) | −0.07 (−0.23 to 0.08) | 1.37 (0.68 to 2.76) | 0.410 |
| 24 h | 66 (85.7) | 71 (89.9) | −0.04 (−0.14 to 0.06) | 1.48 (0.50 to 4.50) | 0.471 |
| 72 h | 68 (88.3) | 74 (93.7) | −0.05 (−0.14 to 0.04) | 1.95 (0.55 to 7.79) | 0.274 |
| Cognitive |  |  |  |  |  |
| 30 min | 57 (74.0) | 65 (82.3) | −0.08 (−0.21 to 0.05) | 1.62 (0.71 to 3.82) | 0.247 |
| 24 h | 71 (92.2) | 76 (96.2) | −0.04 (−0.11 to 0.03) | 2.13 (0.43 to 13.66) | 0.325 |
| 72 h | 71 (92.2) | 76 (96.2) | −0.04 (−0.11 to 0.03) | 2.13 (0.43 to 13.66) | 0.325 |
| Nociceptive |  |  |  |  |  |
| 30 min | 65 (84.4) | 70 (88.6) | −0.04 (−0.15 to 0.07) | 1.43 (0.51 to 4.13) | 0.489 |
| 24 h | 72 (93.5) | 74 (93.7) | 0.00 (−0.08 to 0.08) | 1.03 (0.23 to 4.67) | >0.99 |
| 72 h | 72 (93.5) | 77 (97.5) | −0.04 (−0.1 to 0.03) | 2.66 (0.42 to 28.74) | 0.273 |
| Emotion |  |  |  |  |  |
| 30 min | 73 (94.8) | 75 (94.9) | −0.01 (−0.05 to 0.03) | 1.02 (0.18 to 5.73) | >0.99 |
| 24 h | 75 (97.4) | 79 (100.0) | −0.03 (−0.06 to 0.01) | − | 0.242 |
| 72 h | 75 (97.4) | 79 (100.0) | 0 (−0.07 to 0.07) | − | 0.242 |
| Activities of daily living |  |  |  |  |  |
| 24 h | 76 (98.70) | 79 (100) | −0.01 (−0.04 to 0.01) | − | 0.494 |
| 72 h | 77 (100.0) | 79 (100.0) | 0.00 (0.00 to 0.00) | − | >0.99 |
| Physiological |  |  |  |  |  |
| 15 min | 49 (63.6) | 47 (59.5) | 0.04 (−0.11 to 0.19) | 0.84 (0.42 to 1.68) | 0.625 |
| 30 min | 69 (89.6) | 69 (87.3) | 0.02 (−0.08 to 0.12) | 0.80 (0.26 to 2.41) | 0.803 |

**Notes:** Recovery was defined as a postoperative score meeting or exceeding the baseline value. A generalized linear mixed model with a binomial distribution and logit link function was fitted to analyze changes in recovery rates over time. Odds ratios > 1.0 indicate lower odds of recovery in the esketamine group relative to the saline group. “—” indicates that the odds ratio was not estimable owing to zero events in one group.

**Abbreviations:** CI, confidence interval; PostopQRS, Postoperative Quality of Recovery Scale.

**Table S4.** Secondary Endpoints and Adverse Events in the Per-Protocol Population.

|  | **Propofol alone**  ***n* = 77** | **Propofol +**  **Esketamine 0.1**  ***n* = 76** | **Propofol +**  **Esketamine 0.2**  ***n* = 79** | ***P* value** | |
| --- | --- | --- | --- | --- | --- |
| **Propofol + Esketamine 0.1 vs Propofol alone** | **Propofol + Esketamine 0.2 vs Propofol alone** |
| Injection pain | 0 (0–3) | 0 (0–1) | 0 (0–0) | 0.002 | < 0.001 |
| Induction time; s | 88 (74–120) | 81 (69–98) | 80 (63–100) | 0.025 | 0.008 |
| Emergence time; min | 6 (4–10) | 7 (4–12) | 6 (4–9) | 0.155 | 0.832 |
| Propofol consumption; mg | 260 (215–300) | 200 (160–240) | 180 (150–210) | < 0.001 | < 0.001 |
| Intra-operative cough score | 1 (1–2) | 1 (1–1) | 1 (0–1) | 0.008 | 0.004 |
| Severe coughing (grade 3) | 7 (9%) | 3 (4%) | 3 (4%) | 0.327 | 0.207 |
| Bronchoscopist satisfaction score | 4 (4–5) | 4 (4–5) | 4 (4–5) | 0.460 | 0.104 |
| Patient satisfaction score | 4 (3–5) | 4 (4–5) | 5 (4–5) | 0.077 | 0.013 |
| Patient willingness to repeat the bronchoscopy |  |  |  | 0.783 | 0.481 |
| Yes | 67 (87%) | 65 (86%) | 72 (91%) |  |  |
| No | 2 (3%) | 1 (1%) | 0 (0%) |  |  |
| Unsure | 8 (10%) | 10 (13%) | 7 (9%) |  |  |
| Patient willingness to recommend the bronchoscopy |  |  |  | 0.358 | 0.381 |
| Yes | 71 (92%) | 74 (97%) | 76 (96%) |  |  |
| No | 1 (1.3%) | 0 (0%) | 0 (0%) |  |  |
| Unsure | 5 (6.5%) | 2 (2.6%) | 3 (3.8%) |  |  |
| Adverse events |  |  |  |  |  |
| Hypotension | 42 (55%) | 24 (32%) | 10 (13%) | 0.007 | < 0.001 |
| Hypertension | 3 (4%) | 3 (4%) | 7 (9%) | > 0.99 | 0.328 |
| Hypoxia | 17 (22%) | 10 (13%) | 3 (4%) | 0.217 | 0.001 |
| Nausea or vomiting | 4 (5%) | 2 (3%) | 6 (8%) | 0.681 | 0.746 |
| Bradycardia | 7 (9%) | 4 (5%) | 1 (1%) | > 0.99 | 0.065 |
| Tachycardia | 5 (7%) | 9 (12%) | 8 (10%) | 0.386 | 0.595 |
| Nightmare | 2 (3%) | 1 (1%) | 3 (4%) | > 0.99 | > 0.99 |

**Notes:** Data are presented as median (interquartile range) or *n* (%). This table presents per-protocol analysis results (*n* = 232) as a sensitivity analysis to complement the intention-to-treat results in Table 2 (*n* = 246). *P* values are two-sided, unadjusted for multiple comparisons, and should be interpreted as descriptive.

**Abbreviation:** NRS, numerical rating scale.


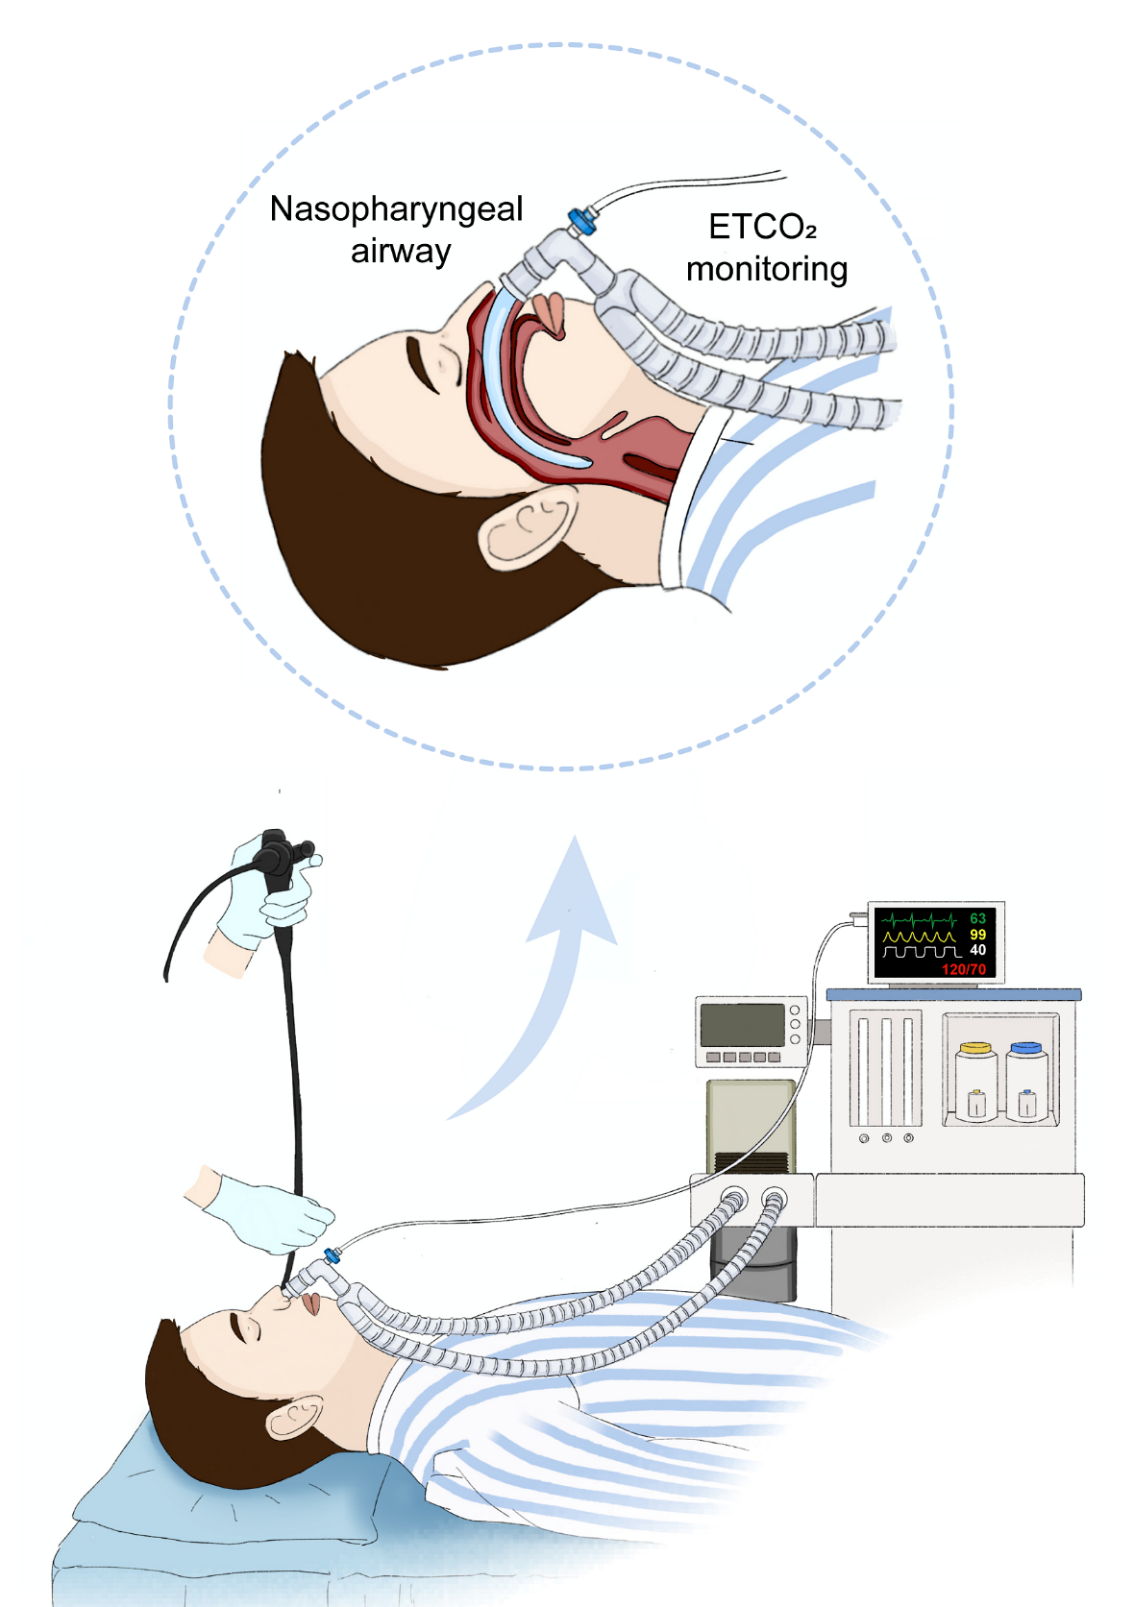


**Figure S1.** Procedural setup for flexible bronchoscopy.

Notes: Standardized procedural configuration showing nasopharyngeal airway positioning for oxygen delivery, bronchoscope insertion through the contralateral nostril, continuous capnography, patient positioning, intravenous access, the bronchoscopy system with video display, and physiological monitoring equipment. This setup was identical across all three treatment groups.


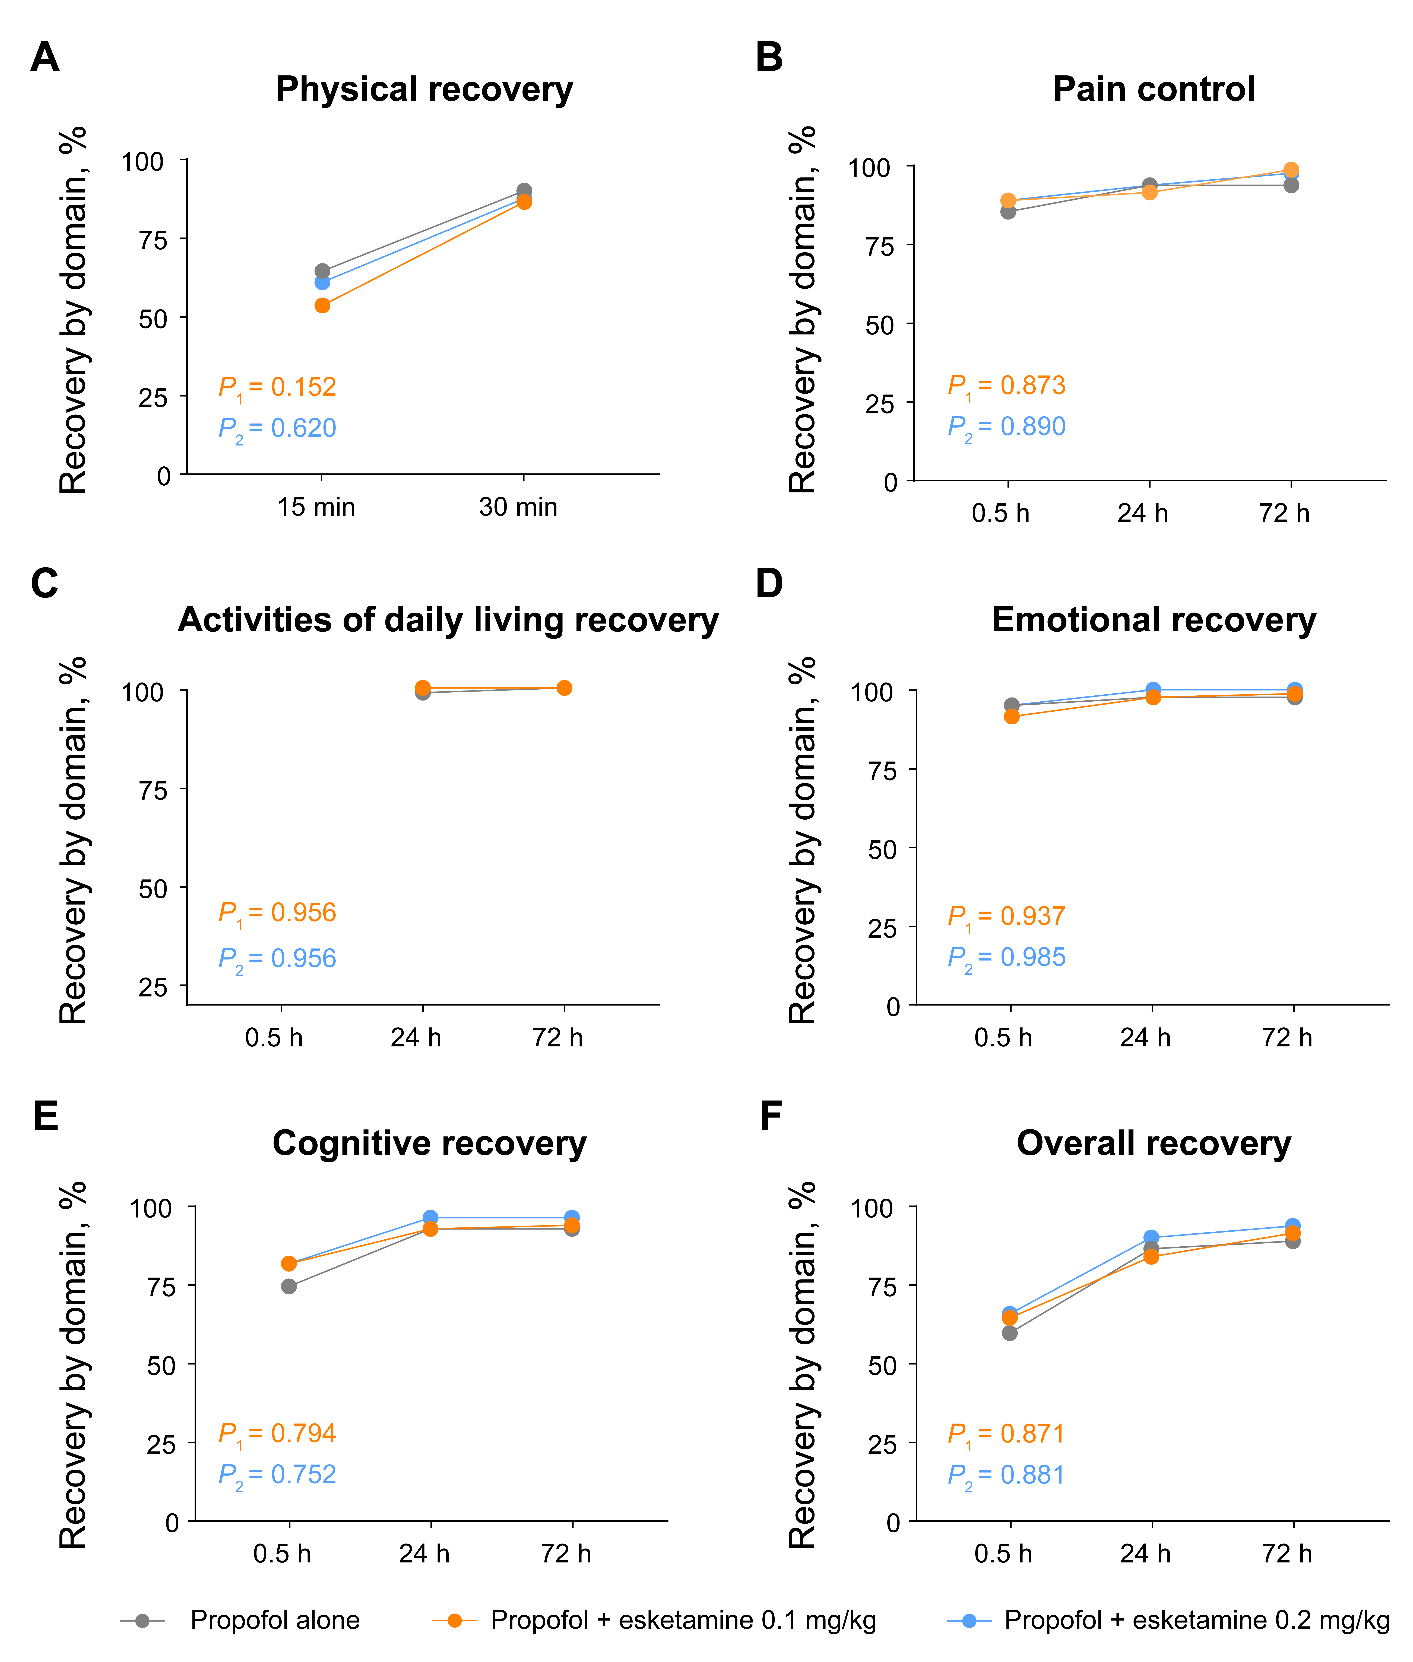


**Figure S2.** Recovery quality across PostopQRS domains following flexible bronchoscopy.

Notes: Proportion of participants achieving recovery across the overall composite and five PostopQRS domains: overall (A), activities of daily living (B), nociceptive (C), emotive (D), cognitive (E), and physiological (F). Recovery was defined as a postoperative score meeting or exceeding the baseline value in the corresponding domain. *P*1 and *P*2 represent group-by-time interaction *P* values for propofol + esketamine 0.1 mg/kgversus propofol alone and propofol+ esketamine 0.2 mg/kg versus propofol alone, respectively.
